# Supplementary material for: Ultra-rapid formation of ZnO hierarchical structures from dilution-induced supersaturated solutions
Source: Royal Society of Chemistry journal article supplement (doi:10.1039/c4ce00765d), 2014-01-01
Supplement: c4ce00765d1.pdf [file c4ce00765d1.pdf]

## Supporting Information for

### Ultra-rapid formation of ZnO hierarchical structures from dilution– induced supersaturated solutions

Jing Wang, Sichao Hou, Lizhao Zhang, Jincai Chen and Lan Xiang\*

\*Department of Chemical Engineering, Tsinghua University, Beijing, 10084, China. Fax: +86-10-

62772051; Tel: +86-10-62788984; E-mail: [xianglan@mail.tsinghua.edu.cn](mailto:xianglan@mail.tsinghua.edu.cn)

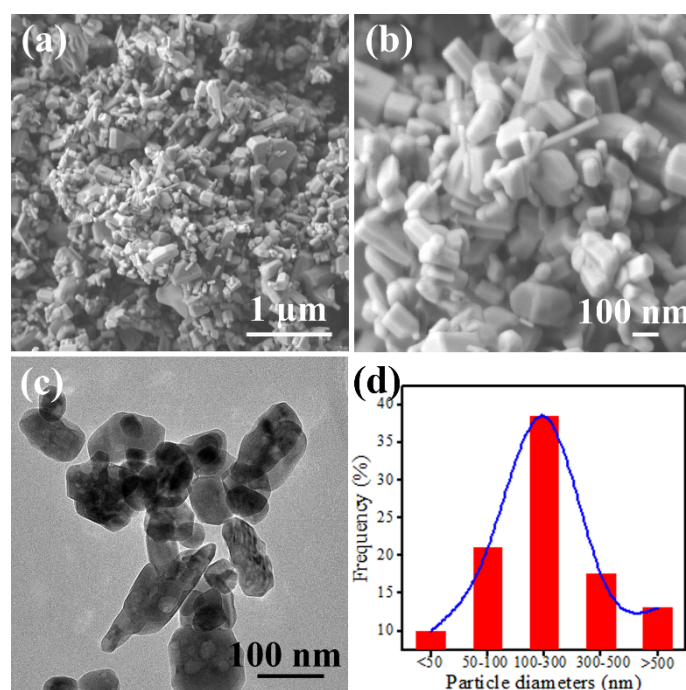

**Fig. S1** SEM (a, b), TEM images (c) and particle size distribution (d) of the commercial ZnO powders. The size distribution was estimated by directly measuring about 200 particles from the typical SEM images.

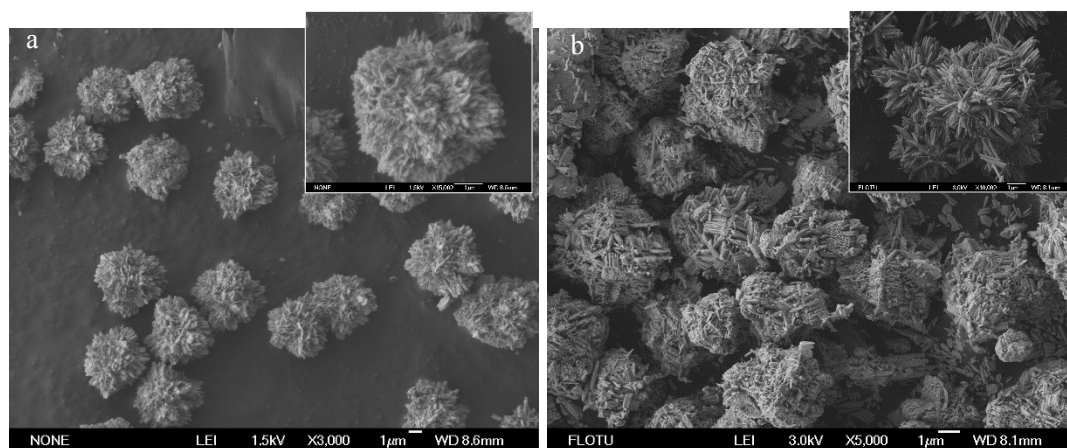

**Fig. S2** SEM images of the samples formed at different S tuned by  $[\text{OH}^-]/[\text{Zn}^{2+}]$ .  $[\text{OH}^-]/[\text{Zn}^{2+}]$ : (a) 4.0 ( $S=2.86$ ); (b) 12.0 ( $S=1.77$ ).

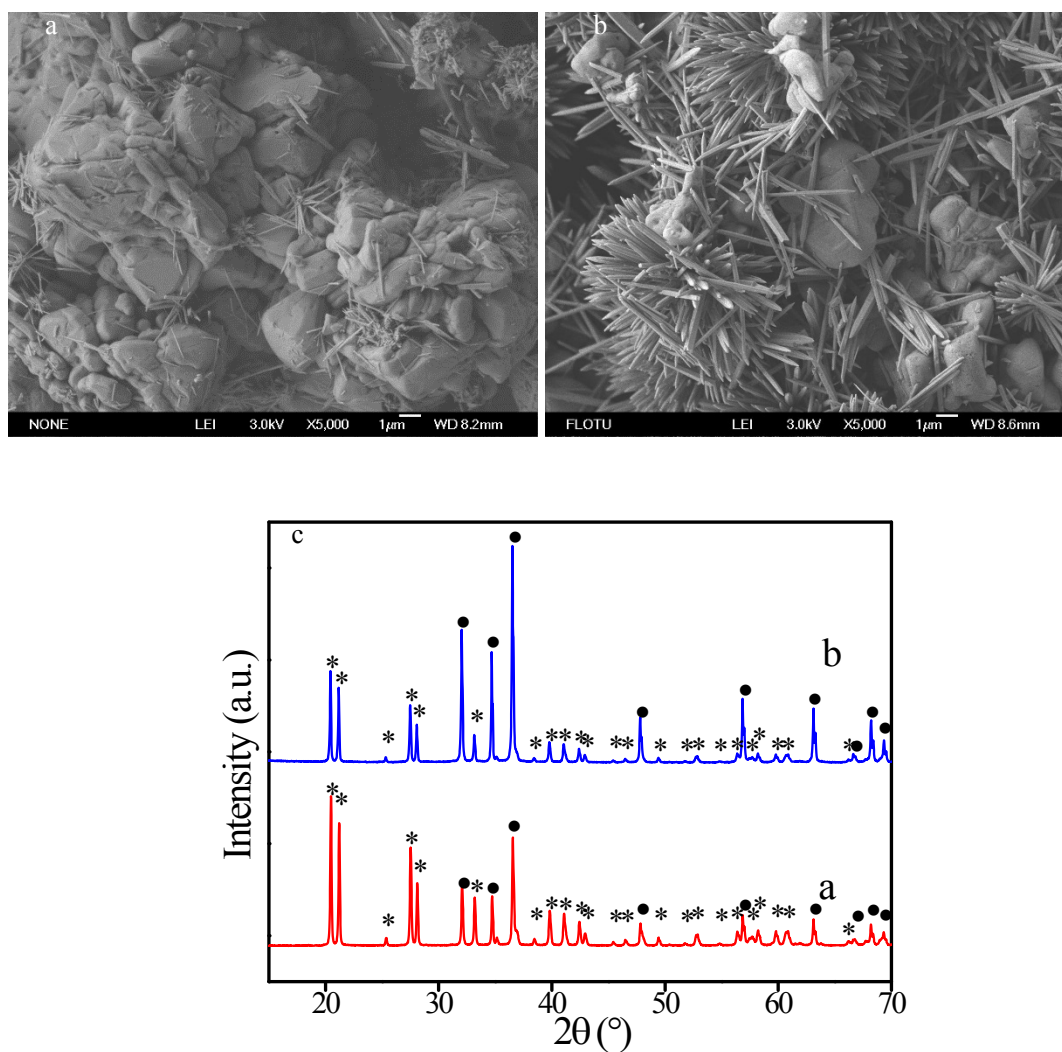

**Fig. S3** SEM image (a, b) and XRD patterns (c) of the samples formed at different reaction time: (a) 30 min; (b) 1 h. Conditions:  $\alpha=25$ ,  $[\text{OH}^-]/[\text{Zn}^{2+}]=6.78:1$  and  $S=1.26$ .

●:ZnO, \*:ε-Zn(OH)<sub>2</sub>.
